# Supplementary material for: Saikosaponin A inhibits influenza A virus replication and lung immunopathology
Source: PubMed Central journal article supplement (PMC4767451; doi:10.18632/oncotarget.6448), 2015-12-02
Supplement: oncotarget-06-42541-s001.pdf [file oncotarget-06-42541-s001.pdf]

# **Saikosaponin a inhibits influenza A virus replication and lung immunopathology**

## **Supplementary Material**

### **Supplementary methods:**

#### **Cell viability assessment using the MTT assay**

Monolayers of A549 cells were cultured in 96-well plates and incubated with serial concentrations of SSa for 48 h at 37°C in a humidified 5% CO<sub>2</sub> incubator. Supernatants were removed and 20 µl of MTT (5 mg/ml in serum-free DMEM) was added. After 4 h, excess MTT was removed and formazan crystals solubilized in 150 µl of DMSO. The optical density was measured at 490 nm with a microplate reader (ELX800-UV, Biotex Co., USA). Cell viability was expressed as a percentage of vehicle control and the 50% cytotoxic concentration (CC<sub>50</sub>) of SSa for A549 cells calculated as the drug concentration required to decrease cell viability by 50%.

#### ***In vivo* SSa toxicity**

To determine *in vivo* SSa toxicity levels, B6 mice were subcutaneously injected (27G needle) with SSa oil emulsions once a day for 6 consecutive days (with 50, 100 and 200 mg/kg/d of SSa respectively). Body weights were determined prior to the first treatment course and for the next 15 days post-treatment.

#### **SSa administration kinetics**

B6 mice were subcutaneously injected (27G needle) with SSa oil emulsions (25 mg/kg/d) once a day for 6 consecutive days either beginning at 24 h prior to or 4, 24 or 72 h post-IAV infection. Mice were monitored daily for the next 21 days post-infection.

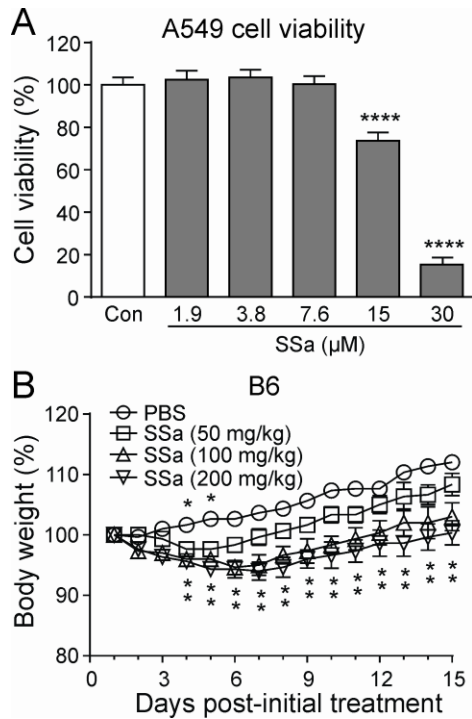

**Supplementary Figure 1: *In vitro* and *in vivo* profile of SSa cytotoxicity**

(A) Cell viability of A549 cells 48 h post-incubation with SSa determined using the MTT assay and expressed as a percentage of the vehicle control (Con, 0.4% DMSO in DMEM). Data is expressed as mean  $\pm$  SEM of three independent experiments. \*\*\*\* $P < 0.0001$  compared to vehicle control. (B) Mouse body weights following daily subcutaneous administration of SSa for 6 consecutive days ( $n = 3$ ). \* denotes  $P < 0.05$  between 50 mg/kg/d (top), 100 mg/kg/d (middle) or 200 mg/kg (bottom) SSa administered B6 mice compared to PBS controls.

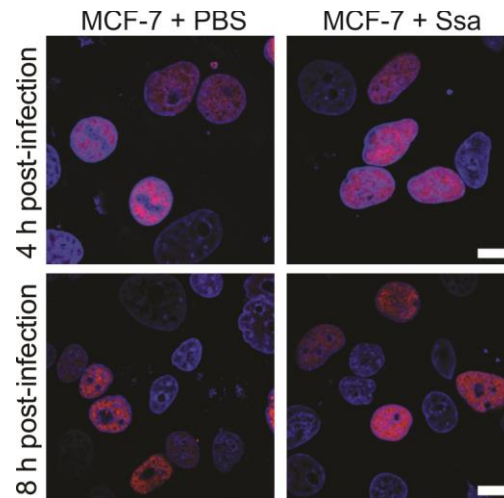

**Supplementary Figure 2: vRNP export is dependent on Caspase 3**

MCF-7 cells which do not express Caspase 3 were infected with PR8 (MOI = 1, 1 h) and cultured  $\pm$  7.6  $\mu$ M SSA for 4 and 8 h post-infection, fixed and stained for IAV NP expression (NP: red, DAPI nuclear stain: blue, merge: magenta, scale = 10  $\mu$ m).

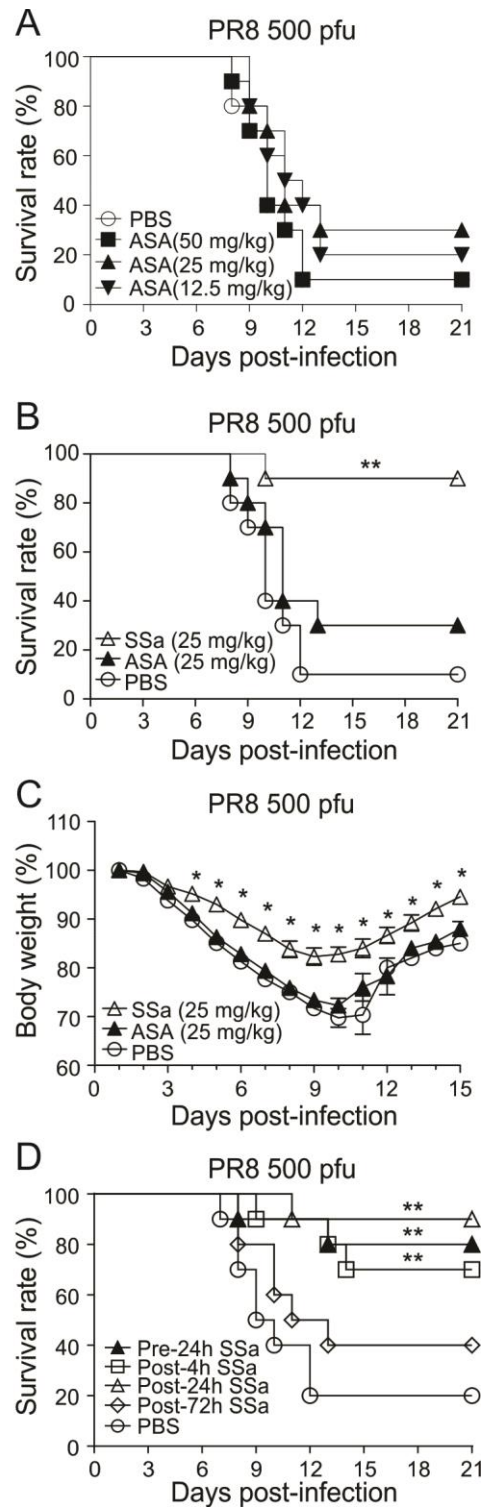

**Supplementary Figure 3: Effects of ASA and SSa on PR8 mortality and morbidity**

(A) B6 mice were infected with 500 pfu of PR8 and administered ASA or PBS oil emulsions daily (25 mg/kg/d) for 6 days beginning at 4 h post-infection (n = 5-6). (B) Effect of SSa versus ASA on survival rates in PR8-infected B6 mice (n = 5-10). PBS oil emulsions used as vehicle controls. \*\*  $P < 0.01$  with respect to ASA or PBS control. (C) Effect of SSa versus ASA on total

body weight loss in PR8-infected B6 mice (n = 5-10). \*  $P < 0.05$  for SSa with respect to ASA or PBS control. (D) Survival rates for PR8-infected B6 mice treated with 25 mg/kg/d SSa for 6 consecutive days beginning at either 24 h prior to or 4, 24 or 72 h post-infection (n = 10). PBS control group was treated at 4 h post-infection. \*\*  $P < 0.01$  compared to PBS control.

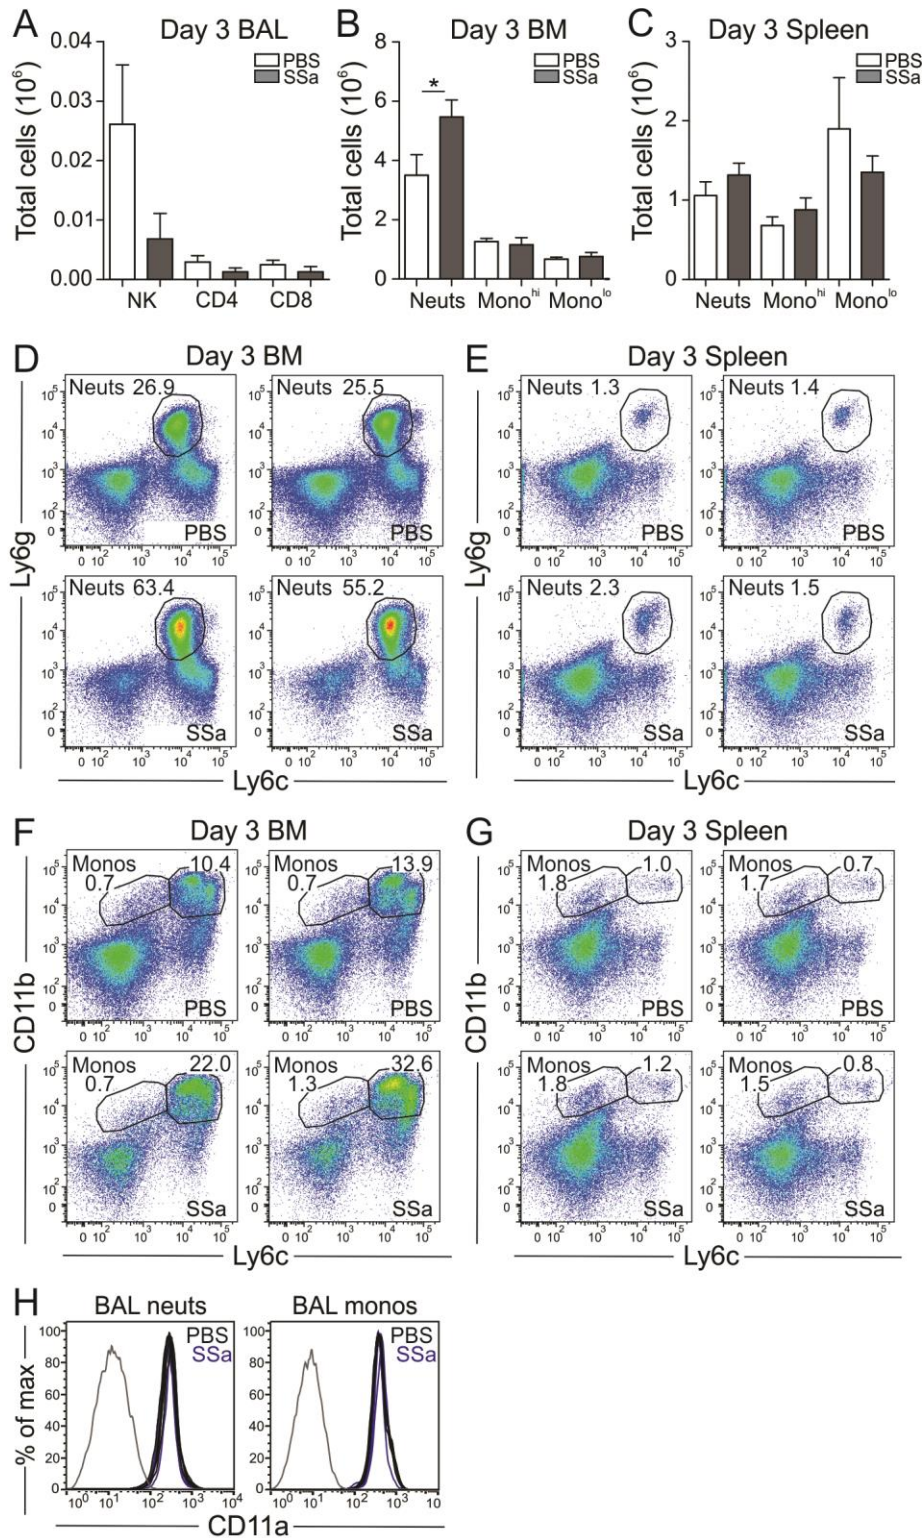

**Supplementary Figure 4: Systematic effects of SSa on innate immune cells at day 3 post-PR8 infection**

(A) Total NK cell, CD4<sup>+</sup> and CD8<sup>+</sup> T cell numbers in the BAL of day 3 PR8-infected B6 mice administered SSa or PBS control (25 mg/kg/d), given as daily subcutaneous injections for 6 days

beginning at 4 h post-infection (n = 8). NK cell, CD4<sup>+</sup> and CD8<sup>+</sup> T cell proportions calculated using flow cytometry. **(B)** Total bone marrow (BM) and **(C)** splenic neutrophil and monocyte (Ly6c<sup>high</sup> versus Ly6c<sup>low</sup> subsets) numbers in day 3 PR8-infected B6 mice administered SSa or PBS control (25 mg/kg/d, n = 8). \*  $P < 0.05$  for SSa treated mice with respect to PBS control. **(D)** BM and **(E)** splenic neutrophil proportions of all CD45<sup>pos</sup> leukocytes in day 3 PR8-infected B6 mice administered SSa or PBS control (25 mg/kg/d). Representative of two independent experiments (n = 8). **(F)** BM and **(G)** splenic Ly6c<sup>high</sup> versus Ly6c<sup>low</sup> monocyte proportions of all CD45<sup>pos</sup> leukocytes in day 3 PR8-infected B6 mice administered SSa or PBS control (25 mg/kg/d). Representative of two independent experiments (n = 8). **(H)** BAL neutrophil and monocyte surface CD11a expression in day 3 PR8-infected B6 mice administered SSa or PBS control (25 mg/kg/d, n = 4; black = PBS, blue = SSa, grey = non-binding Ab control).

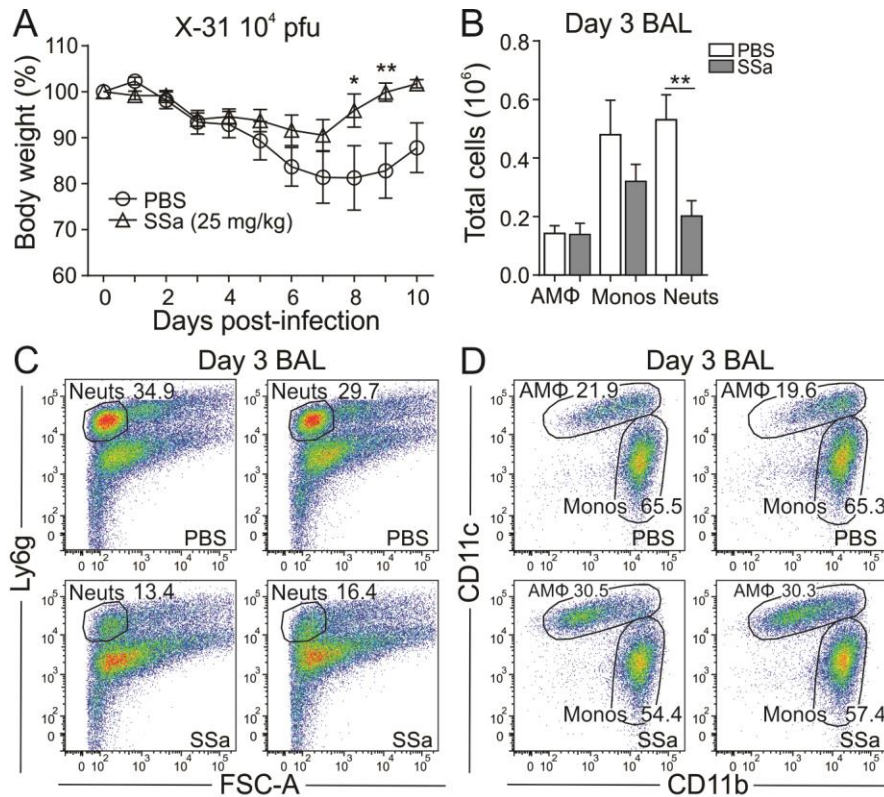

**Supplementary Figure 5: SSa attenuates lung neutrophil recruitment in X-31 infected mice**  
**(A)** Effect of SSa (25mg/kg/d) on total body weight loss in X-31-infected B6 mice ( $n = 5$ ). \*  $P < 0.05$  and \*\*  $P < 0.01$  for SSa with respect to PBS control. SSa administered as daily subcutaneous injections for 6 days beginning at 4 h post-infection. **(B)** AMΦ, monocyte and neutrophil numbers in the BAL of day 3 X-31-infected B6 mice administered SSa or PBS control (25 mg/kg). AMΦ, monocyte and neutrophil BAL cell proportions calculated using flow cytometry. \*  $P < 0.05$  for SSa with respect to PBS control. **(C)** BAL neutrophil and **(D)** AMΦ and monocyte proportions in day 3 X-31-infected B6 mice administered SSa or PBS control (25 mg/kg/d). Representative of  $n = 5$ ; two independent experiments.



**Supplementary Table 1: Monoclonal antibodies used for mouse flow cytometry studies**

| Antibody        | Fluorophore    | Isotype            | Dilution | Company        |
|-----------------|----------------|--------------------|----------|----------------|
| CD45            | FITC           | Rat IgG1, κ        | 1:300    | BD Biosciences |
| Ly6g            | PE             | Rat IgG2b, κ       | 1:300    | BD Biosciences |
| CD11c           | APC            | Ar Ham IgG1,<br>λ2 | 1:300    | BD Biosciences |
| CD11b           | PE-Cy7         | Rat IgG2b, κ       | 1:600    | eBioscience    |
| Ly6c            | APC-eFluor 780 | Rat IgG2c, κ       | 1:300    | eBioscience    |
| CD11a           | PerCP-Cy5.5    | Rat IgG2a, κ       | 1:300    | Biolegend      |
| CD115           | PE             | Rat IgG2a, κ       | 1:300    | eBioscience    |
| CD3             | APC            | Ar Ham IgG         | 1:300    | eBioscience    |
| CD4             | Pe-Cy7         | Rat IgG2a, κ       | 1:300    | BD Biosciences |
| CD8a            | BV510          | Rat IgG2a, κ       | 1:300    | BD Biosciences |
| Isotype control | PE             | Rat IgG1, κ        | 1:300    | BD Biosciences |
| Isotype control | APC            | Rat IgG2b, κ       | 1:300    | BD Biosciences |
| Isotype control | PerCP-Cy5.5    | Rat IgG2b, κ       | 1:300    | Biolegend      |
